# Supplementary material for: The Actual Demand for the Elimination of Architectural Barriers among Senior Citizens in Poland
Source: MDPI journal article supplement (doi:10.3390/ijerph16142601), 2019-07-22
Supplement: s1 [file s1]

**Research on the actual number of people reporting the need to eliminate architectural and technical barriers in their environment**

**1. Have you used state funds granted for the elimination of architectural and technical barriers:**

- ☐ Yes
- ☐ No

**2. Do you have facilities adapting your apartment/house to your needs:**

- |                                                            |                                                         |
|------------------------------------------------------------|---------------------------------------------------------|
| <input type="radio"/> Various handholds / grippers         | <input type="radio"/> Extended door frames              |
| <input type="radio"/> Adjusted bathrooms / toilets         | <input type="radio"/> Hoists and lifting mechanisms     |
| <input type="radio"/> Slip resistant flooring              | <input type="radio"/> Different texture / colour floors |
| <input type="radio"/> Additional handrails along the walls | <input type="radio"/> Lifting equipment                 |
| <input type="radio"/> Adjusted thresholds for doors        | <input type="radio"/> None of the above                 |
| <input type="radio"/> Ramps                                | <input type="radio"/> Other, what kind .....            |

**3. Which of the following facilities should be adapted to adjust your apartment/house to your needs and facilitate moving around:**

- |                                                            |                                                         |
|------------------------------------------------------------|---------------------------------------------------------|
| <input type="radio"/> Various handholds / grippers         | <input type="radio"/> Extended door frames              |
| <input type="radio"/> Adjusted bathrooms / toilets         | <input type="radio"/> Hoists and lifting mechanisms     |
| <input type="radio"/> Slip resistant flooring              | <input type="radio"/> Different texture / colour floors |
| <input type="radio"/> Additional handrails along the walls | <input type="radio"/> Lifting equipment                 |
| <input type="radio"/> Adjusted thresholds for doors        | <input type="radio"/> None of the above                 |
| <input type="radio"/> Ramps                                | <input type="radio"/> Other, what kind .....            |

**4. Do you have a disability certificate:**

- ☐ Yes
- ☐ No

**5. If yes, the certificate refers to:**

- ☐ significant disability
- ☐ moderate disability
- ☐ slight disability

**6. Do you have a mobility limitation requiring to use the following while moving:**

- ☐ wheelchair;
- ☐ crutch;
- ☐ walking frame
- ☐ other, what kind .....

**7. Do you leave your apartment/house on your own:**

- ☐ Yes
- ☐ No

**8. If not, who helps you in moving around:**

- ☐ family member
- ☐ social worker
- ☐ other people, who .....

**9. Please indicate what mobility facilities you need to move in your immediate environment (neighbourhood) - outside your apartment/house:**

- |                                                    |                                                            |
|----------------------------------------------------|------------------------------------------------------------|
| <input type="radio"/> Slipways                     | <input type="radio"/> Additional handrails along the walls |
| <input type="radio"/> Driveways                    | <input type="radio"/> Extended door frames                 |
| <input type="radio"/> Ramps                        | <input type="radio"/> Different texture / colour pavements |
| <input type="radio"/> Lift                         | <input type="radio"/> Lifting equipment                    |
| <input type="radio"/> Benches in close proximity   | <input type="radio"/> None of the above                    |
| <input type="radio"/> Various handholds / grippers | <input type="radio"/> Other, what kind .....               |

**10. The respondent's place of residence:**

- ☐ Detached house
- ☐ Terraced house
- ☐ Apartment in a multi-family building (block of flats)
- ☐ Nursing home
- ☐ Other, what kind .....

**11. The respondent's family situation:**

- ☐ I live alone
- ☐ I live with my husband/wife
- ☐ I live with my husband/wife and children
- ☐ I live with my children
- ☐ I live with (my parents, sister, brother, extended family)\*delete as appropriate
- ☐ Nursing home
- ☐ Other, what kind .....

**12. Age range:**

- ☐ 55-60
- ☐ 60-65
- ☐ 65-70
- ☐ 70-75
- ☐ 75-80
- ☐ 80-85
- ☐ 85 and older

**13. Place of residence:**

- ☐ village
- ☐ city up to 50 000 residents
- ☐ city up to 100 000 residents
- ☐ city up to 250 000 residents
- ☐ city over 250 000 residents

**14. Gender:**

- ☐ female
- ☐ male

Source: Authors' compilation
